# Supplementary material
Source: MDPI journal article supplement (https://www.mdpi.com/2075-163X/12/7/812)
Supplement: s1 [file s1]

# Bioavailability of colloidal iron to heterotrophic bacteria in sediments, and effects on the mobility of colloid-associated metal(loid)s

Malgorzata Grybos <sup>1,\*</sup>, Delphine Masson <sup>1</sup>, Pauline Gorgeon <sup>1</sup>, Patrice Fondanèche <sup>1</sup>, Nicolas Martin <sup>1</sup>, Fabrice Dupuy <sup>1</sup>, Emmanuel Joussein <sup>1</sup>, and Valentin Robin <sup>1,\*</sup>

<sup>1</sup> E2Lim (UR 24 133) Université de Limoges, 123 avenue Albert Thomas, 87060 Limoges Cedex, France; malgorzata.grybos@unilim.fr

\* Correspondance: malgorzata.grybos@unilim.fr; valentin.robin@unilim.fr

Supplementary Information (SI-1). Chemical characterization and grain size distribution of raw sediments before colloids extraction.

**Table S1.** Major and trace elements composition of Champsanglard (CHA) and L'Escourou (LSC) sediments.

|     | Al <sub>2</sub> O <sub>3</sub> | SiO <sub>2</sub> | Fe <sub>2</sub> O <sub>3</sub> | CaO  | K <sub>2</sub> O | MgO  | MnO  | TiO <sub>2</sub> | Zn  | Cr  | As  | Pb  | Ba  | Cu  | Ni  | P    | C    | N    |
|-----|--------------------------------|------------------|--------------------------------|------|------------------|------|------|------------------|-----|-----|-----|-----|-----|-----|-----|------|------|------|
|     | %wt.                           | %wt.             | %wt.                           | %wt. | %wt.             | %wt. | %wt. | %wt.             | ppm | wt.% | wt.% | wt.% |
| CHA | 18.6                           | 55.7             | 7.3                            | 0.8  | 2.5              | 1.5  | 0.1  | 1.0              | 236 | 80  | 21  | 121 | 370 | 36  | 32  | 0.16 | 5.2  | 0.6  |
| LSC | 17.5                           | 49.5             | 5.0                            | 14.7 | 2.0              | 1.2  | 0.1  | 0.5              | 102 | 75  | 11  | 43  | 332 | 36  | 26  | 0.08 | 5.2  | 0.4  |

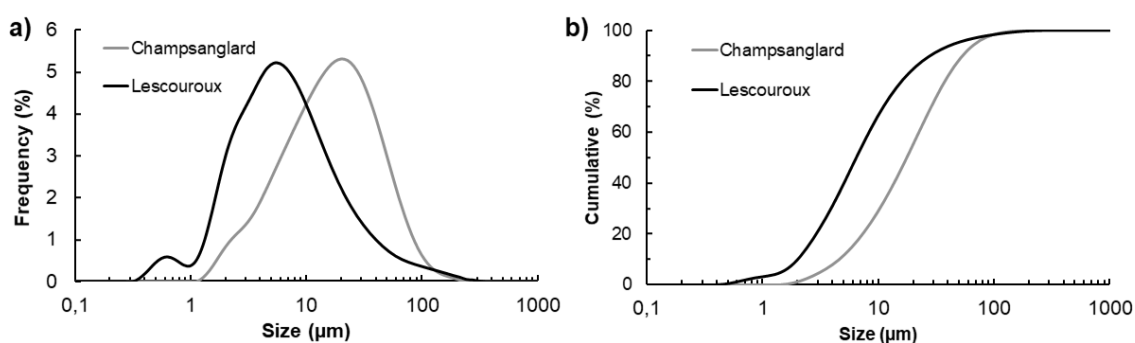

**Figure S1:** Grain size distribution of L'Escourou and Champsanglard sediments. (a) Frequency/Size, (b) Cumulative/Size.

**Table S2:** Data for bulk sediments from Laser Diffraction measurements

|               | D10 | D50  | D90  | Span | Clay | Silt | Sand |
|---------------|-----|------|------|------|------|------|------|
| Sample        | μm  | μm   | μm   |      | %    | %    | %    |
| Champsanglard | 4.6 | 17.7 | 53.9 | 2.8  | 1.2  | 91.9 | 6.9  |
| L'Escourou    | 2.0 | 6.5  | 28.3 | 4.0  | 9.8  | 86.7 | 3.5  |

L'Escourou sediment can be qualified as silt, while Champsanglard sediment is a sandy silt.

Supplementary Information (SI-2). Chemical “quality” of large colloids

**Table S3:** Chemical composition of the 0.2-1  $\mu\text{m}$  size fraction of the colloids (*i.e.* large colloids) expressed in micrograms of metals by grams of dried (30°C) large colloids ( $\text{mg}\cdot\text{g}_{\text{coll}}^{-1}\text{DW}$ ).

| Large colloids          | Al                                                   | Fe                                                   | Mn                                                   | Cr                                                   | As                                                   | Pb                                                   | C <sub>org</sub>                                     | N <sub>tot</sub>                                     | P <sub>tot</sub>                                     |
|-------------------------|------------------------------------------------------|------------------------------------------------------|------------------------------------------------------|------------------------------------------------------|------------------------------------------------------|------------------------------------------------------|------------------------------------------------------|------------------------------------------------------|------------------------------------------------------|
|                         | $\text{mg}\cdot\text{g}_{\text{coll}}^{-1}\text{DW}$ |
| CHA 0.2-1 $\mu\text{m}$ | 69.4 $\pm$ 11.6                                      | 37.9 $\pm$ 3.5                                       | -                                                    | 0.046 $\pm$ 0.008                                    | 0.030 $\pm$ 0.001                                    | 0.114 $\pm$ 0.002                                    | 9.8 $\pm$ 6.5                                        | 3.82 $\pm$ 3.76                                      | 5.58 $\pm$ 1.24                                      |
| LSC 0.2-1 $\mu\text{m}$ | 64.1 $\pm$ 8.7                                       | 33.3 $\pm$ 4.4                                       | 0.22 $\pm$ 0.04                                      | 0.063 $\pm$ 0.008                                    | 0.018 $\pm$ 0.003                                    | 0.033 $\pm$ 0.005                                    | 20.2 $\pm$ 1.9                                       | 1.83 $\pm$ 0.64                                      | 12.23 $\pm$ 1.25                                     |

Supplementary Information (SI-3). Kinetics of carbohydrates consumption

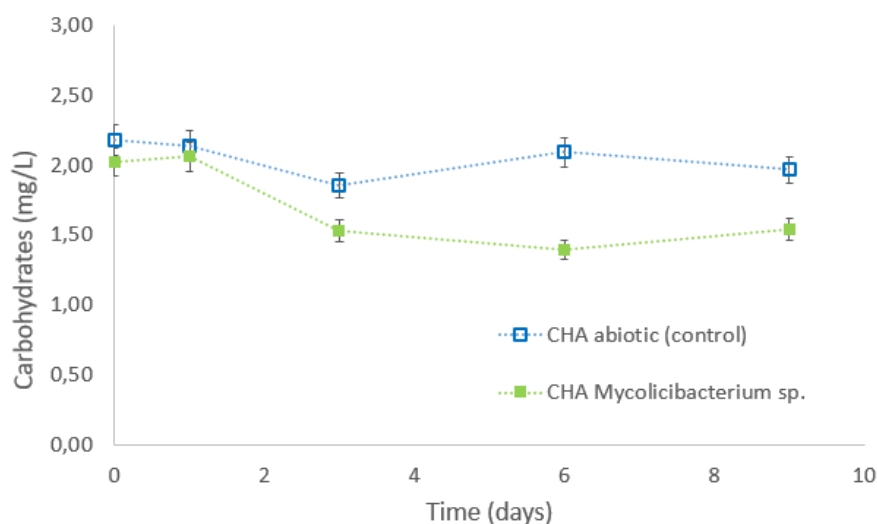

**Figure S2:** Evolution of carbohydrates concentration as a function of time for two conditions: bacteria with silica gel containing CHA-colloids in BHM (Test 3); and silica gel containing CHA-colloids under abiotic conditions in BHM\* (Test 4, *i.e.* “control”). Results are reported here only for *Mycolicibacterium* sp. and Champsanglard colloids for clarity purpose. Error bars represent 1 SD.

\*BHM-modified Bushnell-Hass growth medium, depleted with dissolved iron.
